# Supplementary material for: Phosphate removal by a nano-biosorbent from the synthetic and real (Persian Gulf) water samples
Source: Royal Society of Chemistry journal article supplement (doi:10.1039/c5ra03191e), 2015-01-01
Supplement: c5ra03191e1.pdf [file c5ra03191e1.pdf]

## Supplementary data

### Phosphate removal by a nano-biosorbent from the synthetic and real (*Persian Gulf*) water

M. Arshadi\*<sup>1</sup>, J. Etemad Gholtash<sup>2</sup>, H. Zandi<sup>3</sup>, S. Foroughifard<sup>4</sup>

<sup>1</sup>Department of Chemistry, Shiraz Branch, Islamic Azad University, P.O. Box 71955-149 Shiraz, Fars, Iran

<sup>2</sup>Department of Chemistry, Firozabad Branch, Islamic Azad University, Firozabad, Fars, Iran

<sup>3</sup>Department of Chemistry, Yadegar-e-Imam Khomeini (RAH), Shahre-rey Branch, Islamic Azad University, Tehran, Iran

<sup>4</sup>Department of Fishery, University of Guilan, P.O. Box 1144, Sowmesara, Iran

---

\* To whom correspondence should be addressed. Tel.: +989361528179.  
E-mail Address: [m-arshadi@ch.iut.ac.ir](mailto:m-arshadi@ch.iut.ac.ir), [mohammadarshadi@yahoo.com](mailto:mohammadarshadi@yahoo.com) (M. Arshadi)

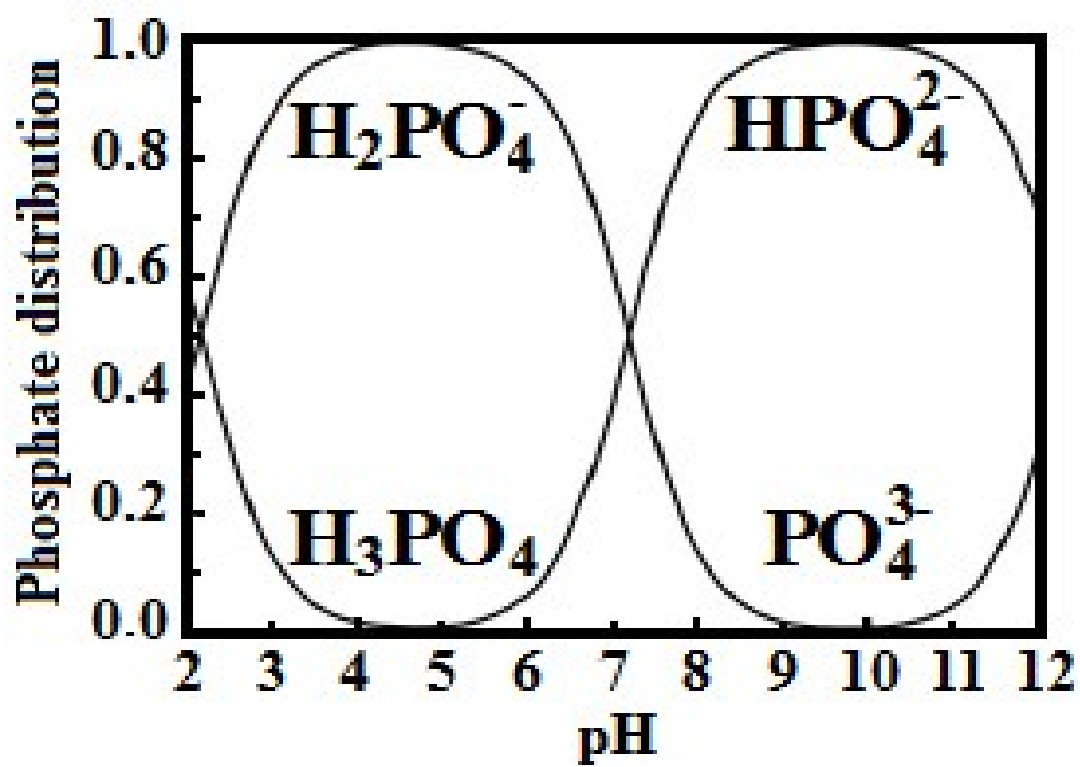

Figure S1. P speciation as function of pH.

Table S1. Adsorption isotherm and kinetics equations.

| Name                     | Equation*                               |
|--------------------------|-----------------------------------------|
| Langmuir                 | $q_e = \frac{q_m K_L C_e}{1 + K_L C_e}$ |
| Freundlich               | $q_e = K_F C_e^{1/n}$                   |
| Pseudo-first-order       | $q_t = q_e [1 - \exp(-k_1 t)]$          |
| Pseudo-second-order      | $q_t = k_2 q_e^2 t / 1 + k_2 q_e t$     |
| Intra-particle diffusion | $q_t = k_{int} t^{1/2}$                 |
| Initial adsorption rate  | $h = k_2 q_e^2$                         |

\*  $q_e$  (mg g<sup>-1</sup>) is the specific equilibrium amount of adsorbate,  $C_e$  (mg L<sup>-1</sup>) is the equilibrium concentration of adsorbate,  $q_m$  is the maximal adsorption capacity and  $K$  ( $K_L$  and  $K_{LF}$ ) (L mol<sup>-1</sup>) and  $n$  are empirical constants that indicate the extent of adsorption and the adsorption effectiveness, respectively.

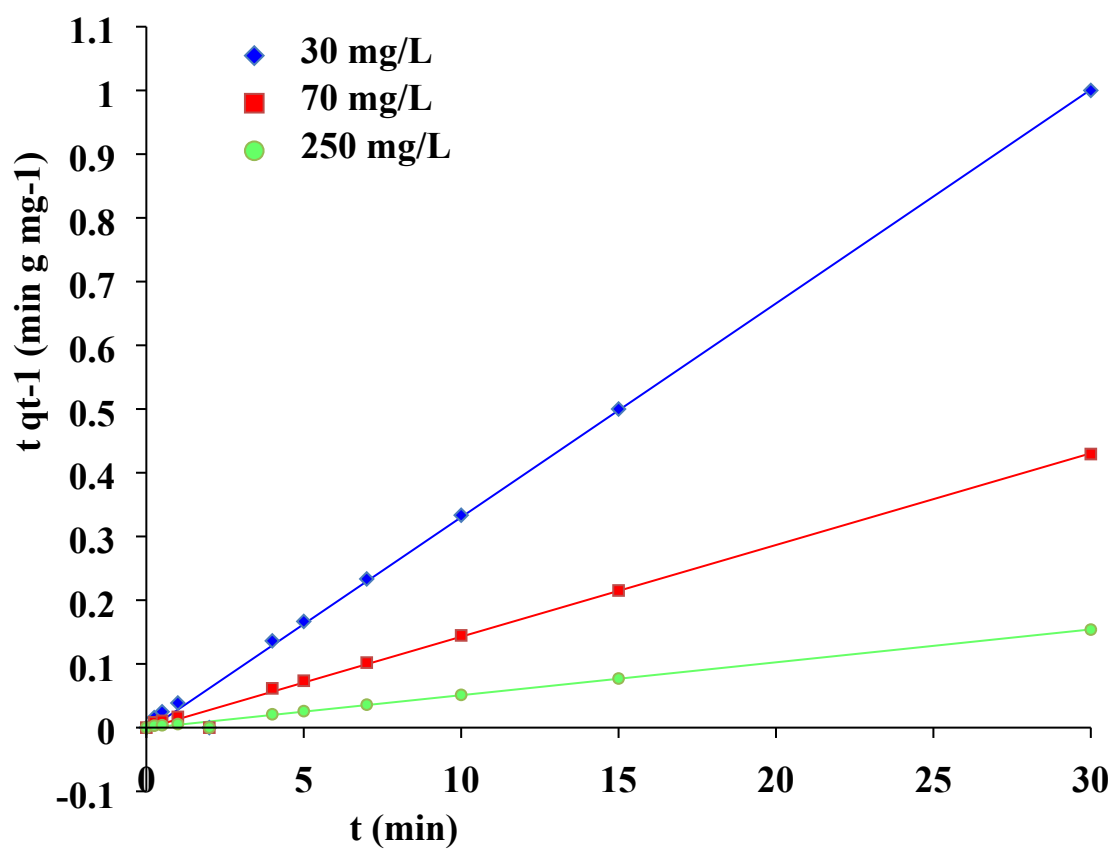

Figure S2. The plot of linear form of the pseudo-second-order for the adsorption of P ions by B-HNO<sub>3</sub>-NZVI.

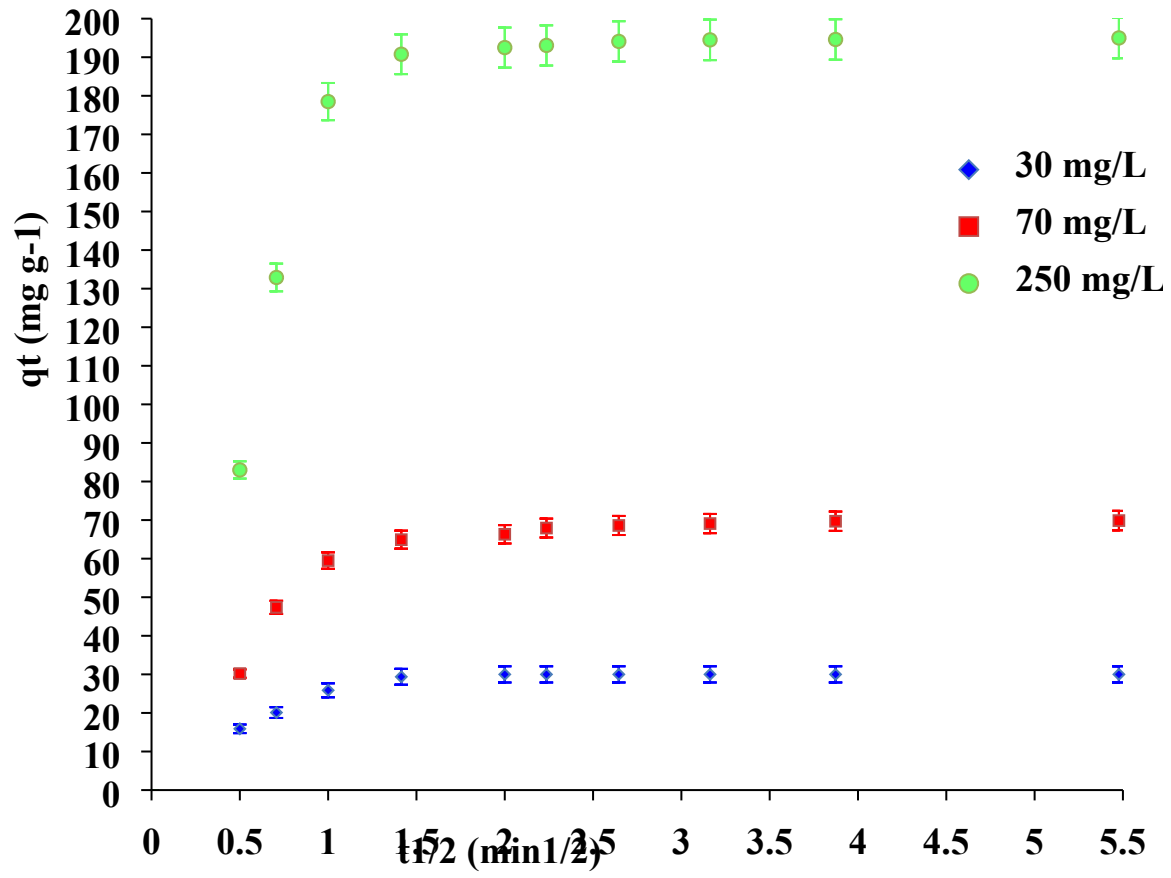

Figure S3. Intraparticle diffusion for P adsorption on B-HNO<sub>3</sub>-NZVI.

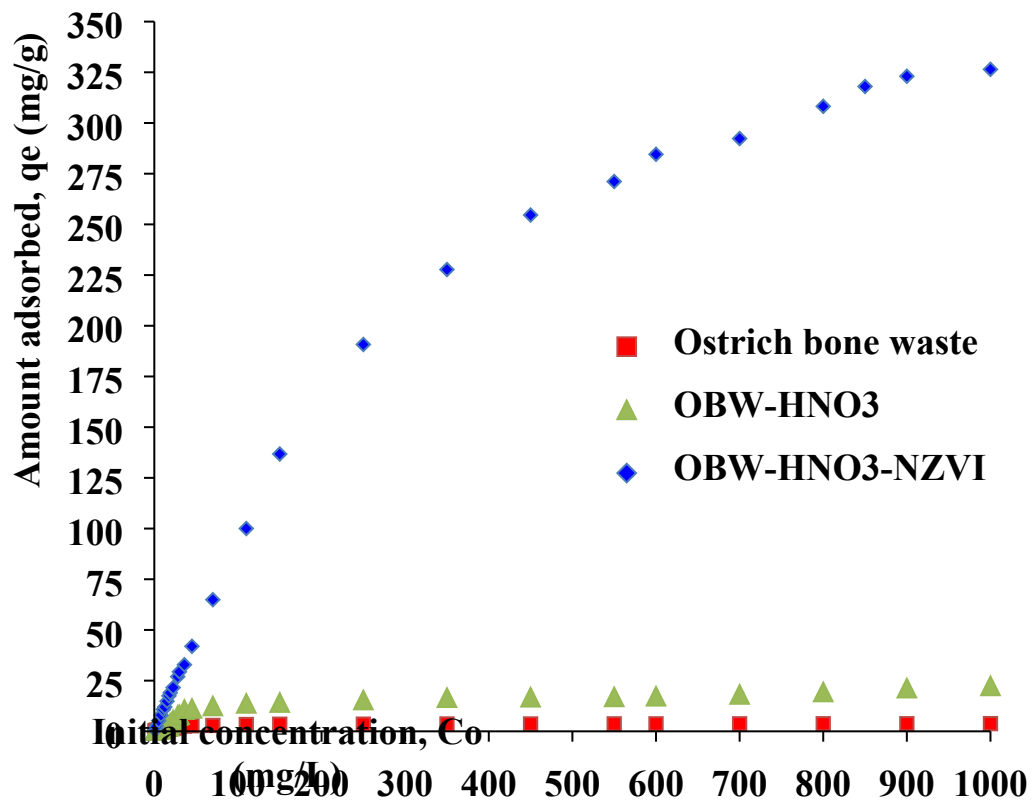

Figure S4. The effect of initial concentrations for the adsorption of P ions on the biomaterials at 25°C.
